# Supplementary material for: Hemolysis detection using the GEM 7000 at the point of care in a pediatric hospital setting: does it affect outcomes?
Source: publisher site journal article supplement (doi:10.1515/cclm-2025-0890), 2025-07-16
Supplement: Supplementary file 1 [file j_cclm-2025-0890_suppl_001.docx]

Supplementary Table 1: Conversion of hemocue plasma free hemoglobin values to GEM 7000 hemolysis indices

| HemoCue values (mg/dL) to GEM 7000 indices | GEM 7000 index |
| --- | --- |
| None (0 – 115) | None (0 – 115) |
| Mild (116 – 300) | Mild(116 – 300) |
| Moderate (301 – 400) | Moderate (301 – 400) |
| Gross (≥ 401) | Gross (≥ 401) |

Supplementary Table 2: Hemolysis index rate across different hospital units

|  |  | **Hemolysis index (%)** | | | | | | |
| --- | --- | --- | --- | --- | --- | --- | --- | --- |
|  | **Total** | **1** | **2** | **3** | **4** | **5** | **6** | **(4 & 5)** |
| EC | 953 | 750 (78.7) | 97 (10.2) | 48 (5.0) | 23 (2.4) | 7 (0.7) | 28 (2.9) | 30 (3.1) |
| NICU | 7079 | 7066 (99.8) | 9 (0.1) | 2 (0.03) | 1 (0.01) | 0 | 1 (0.01) | 1 (0.01) |
| Total | 8032 |  |  | 81 (1%) | | |  |  |

Supplementary Table 3: Concordance of hemolysis indices for flagged potassium results between the GEM 7000 and Vitros XT 7600

| GEM 7000 vs Vitros H-indices for flagged potassium results for slight and moderate hemolysis (%) | |
| --- | --- |
| Match | 50 (61.7) |
| Unmatched | 29 (35.8) |
| Unmeasured | 2 (2.5) |
| Total | 81 (100) |
